# Supplementary material for: A Case Study of the Morphological and Molecular Variation within a Ciliate Genus: Taxonomic Descriptions of Three Dysteria Species (Ciliophora, Cyrtophoria), with the Establishment of a New Species
Source: MDPI journal article supplement (doi:10.3390/ijms23031764), 2022-02-03
Supplement: s1 [file s1]

**Table S1.** Morphological comparison of populations of *Dysteria crassipes*.

| Characters                 | Original population       | Yellow Sea                | Bohai Sea   | South China Sea | East China Sea |
|----------------------------|---------------------------|---------------------------|-------------|-----------------|----------------|
| Body length in vivo        | –                         | 50–80                     | 40–60       | 50–60           | 50–65          |
| Body shape                 | Rectangular to pentagonal | Rectangular to pentagonal | Rectangular | Rectangular     | Rectangular    |
| No. of RK                  | 4                         | 4                         | 4           | 4               | 4              |
| No. of FVK                 | 2                         | 2                         | 2           | 2               | 2              |
| No. of LK                  | –                         | 5–9                       | 7–8         | 6–8             | 5–9            |
| No. of basal bodies in FvK | –                         | 156–186                   | 74–106      | 89–121          | 93–131         |
| No. of basal bodies in TF  | –                         | 7–10                      | 5–6         | 6–7             | 3–7            |
| No. of basal bodies in EF  | –                         | 9–34                      | 3–17        | 4–20            | 5–20           |
| Data source                | [31]                      | [8]                       | [9]         | [5]             | Present work   |

EF, equatorial fragment; FvK, frontoventral kineties; LK, left equatorial kineties; RK, right kineties; SK, somatic kineties; TF, terminal fragment.

–Data not available
