# Supplementary material for: A Case Study of the Morphological and Molecular Variation within a Ciliate Genus: Taxonomic Descriptions of Three Dysteria Species (Ciliophora, Cyrtophoria), with the Establishment of a New Species
Source: MDPI journal article supplement (doi:10.3390/ijms23031764), 2022-02-03
Supplement: s1 [file s1]

**Table S2.** Morphological comparison of populations of *Dysteria brasiliensis*.

| Character                  | Rio de Janeiro | Yellow Sea                                  | Yellow Sea                              | Bohai Sea                                   | South China Sea                             | Haikou                                 | East China Sea Ningbo population-I          | East China Sea Ningbo population-I          | East China Sea Ningbo population-I | East China Sea Ningbo population-II     | East China Sea Ningbo population-V          |
|----------------------------|----------------|---------------------------------------------|-----------------------------------------|---------------------------------------------|---------------------------------------------|----------------------------------------|---------------------------------------------|---------------------------------------------|------------------------------------|-----------------------------------------|---------------------------------------------|
| Body length in vivo        | 150            | 100–130                                     | 55–140                                  | 85–125                                      | 115–175                                     | 85–135                                 | 105–125                                     | 115–135                                     | 115–120                            | 170–210                                 | 120–160                                     |
| Body shape                 | Triangular     | Triangular or elongate, with a dorsal spine | Roughly triangular, with a dorsal spine | Triangular or elongate, With a dorsal spine | Triangular or elongate, with a dorsal spine | Elongate trapezoid with a dorsal spine | Triangular or elongate, With a dorsal spine | Triangular or elongate, With a dorsal spine | slim and curved                    | slim body with a prominent dorsal spine | Triangular or elongate, With a dorsal spine |
| No. of RK                  | –              | 5                                           | 5                                       | 5                                           | 5                                           | 5                                      | 5                                           | 5                                           | 5–6                                | 5                                       | 5                                           |
| No. of FVK                 | –              | 2                                           | 2                                       | 2                                           | 2                                           | 2                                      | 2                                           | 2                                           | 2                                  | 2                                       | 2                                           |
| No. of LK                  | –              | 7-8                                         | –                                       | 7–8                                         | 7-8                                         | 7–8                                    | 2-9                                         | 4–8                                         | 5–8                                | 6–8                                     | 4–10                                        |
| No. of basal bodies in FvK | –              | –                                           | –                                       | 190–250                                     | 220–300                                     | –                                      | 182–283                                     | 206–293                                     | 186–271                            | 188–353                                 | 189–261                                     |

| Running title: Description of three <i>Dysteria</i> species |      |                    |     |      |       |      |                 |              |              |              |              |
|-------------------------------------------------------------|------|--------------------|-----|------|-------|------|-----------------|--------------|--------------|--------------|--------------|
| No. of<br>basal<br>bodies in<br>TF                          | –    | 13–15 <sup>b</sup> | –   | 7–12 | 12–14 | 8–17 | 11–17           | 9–17         | 7–16         | 10–18        | 9–15         |
| No. of<br>basal<br>bodies in<br>EF                          | –    | 14–30 <sup>b</sup> | –   | 8–23 | 11–28 | 6–34 | 8–33            | 7–26         | 8–23         | 9–30         | 7–25         |
| Data<br>source                                              | [32] | [33]               | [8] | [9]  | [9]   | [11] | Present<br>work | Present work | Present work | Present work | Present work |

EF, equatorial fragment; FvK, frontoventral kineties; LK, left equatorial kineties; RK, right kineties; SK, somatic kineties; TF, terminal fragment.

–Data not available. <sup>b</sup>Counted from illustration
